# Supplementary material for: DNA replication in primary hepatocytes without the six-subunit ORC
Source: eLife journal article supplement (doi:10.7554/elife.102915), 2024-12-31
Supplement: fig1-data3 [file elife-102915-fig1-data3-v1.zip]

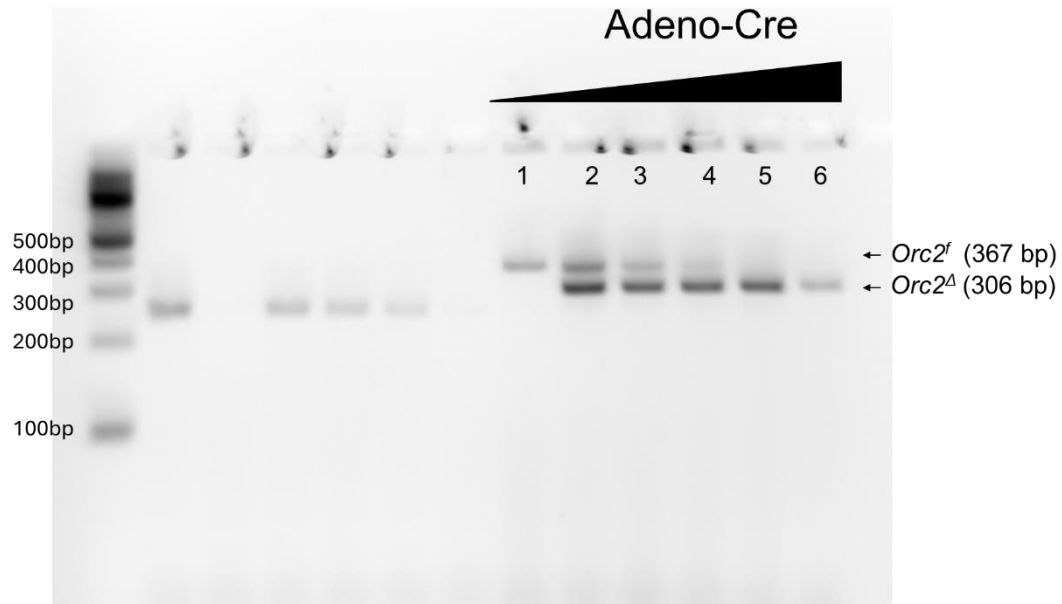

**Figure 1, Source Data 2. Original DNA gel picture corresponding to Figure 1, panel E. Molecular weight markers are labeled on the left. The top band represents mutated allele, the bottom band represents knock-out allele.**
