# Supplementary material for: DNA replication in primary hepatocytes without the six-subunit ORC
Source: eLife journal article supplement (doi:10.7554/elife.102915), 2024-12-31
Supplement: fig1-data5 [file elife-102915-fig1-data5-v1.zip]

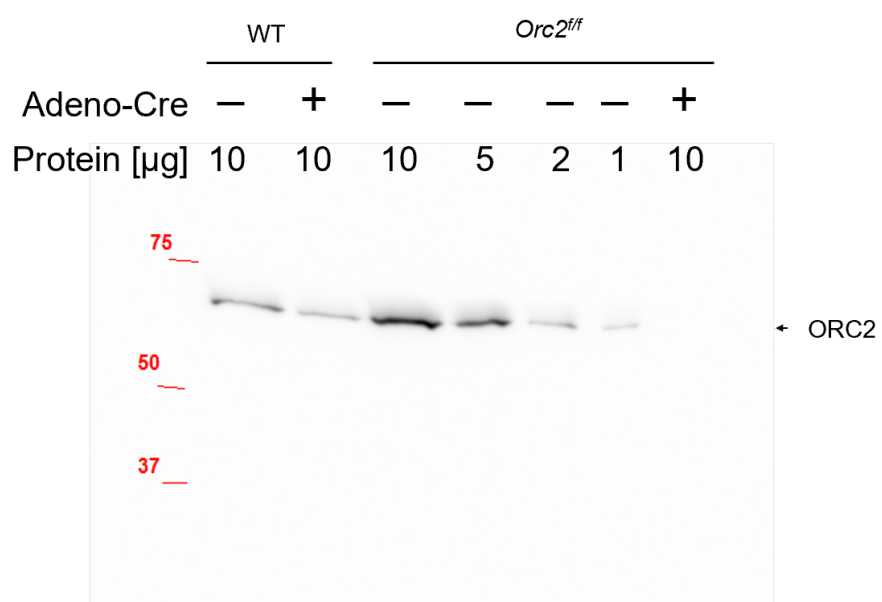

**Figure 1, Source Data 3. Original Western blot membrane picture corresponding to Figure 1, panel F. Molecular weight markers are labeled on the left. The band represents ORC2 protein.**
