# Supplementary material for: DNA replication in primary hepatocytes without the six-subunit ORC
Source: eLife journal article supplement (doi:10.7554/elife.102915), 2024-12-31
Supplement: fig2-data3 [file elife-102915-fig2-data3-v1.zip]

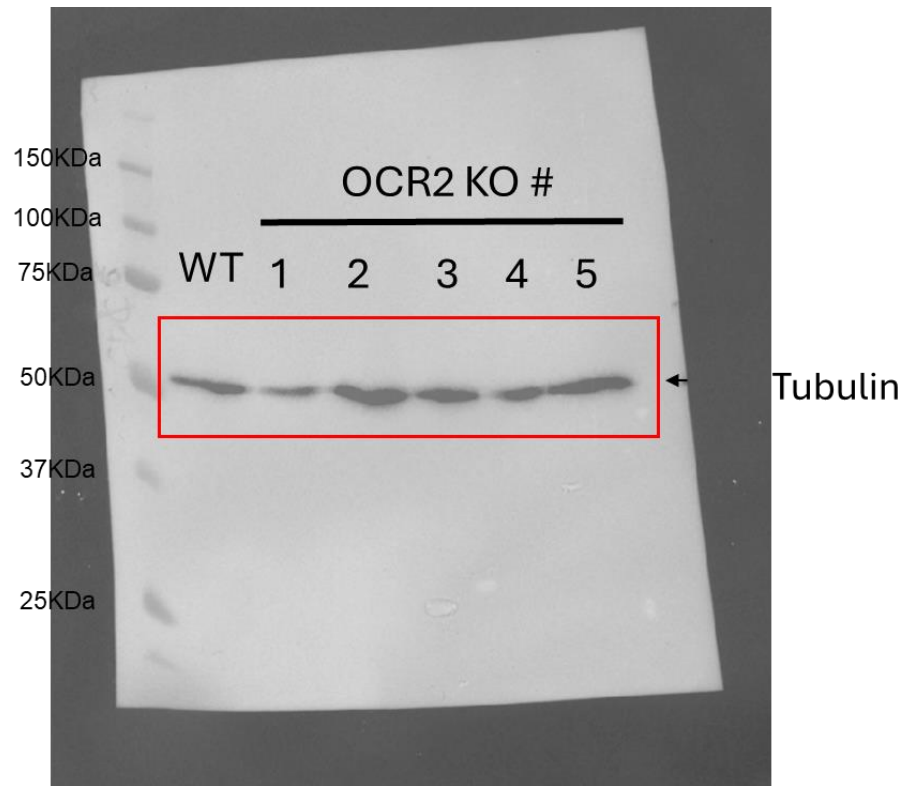

**Figure 2, Source Data 2. Original Western blot membrane picture corresponding to Figure 2, panel C. Molecular weight markers are labeled on the left. The bands next to the arrow represent Tubulin protein.**
