# Supplementary material for: DNA replication in primary hepatocytes without the six-subunit ORC
Source: eLife journal article supplement (doi:10.7554/elife.102915), 2024-12-31
Supplement: fig4-data1 [file elife-102915-fig4-data1-v1.zip]

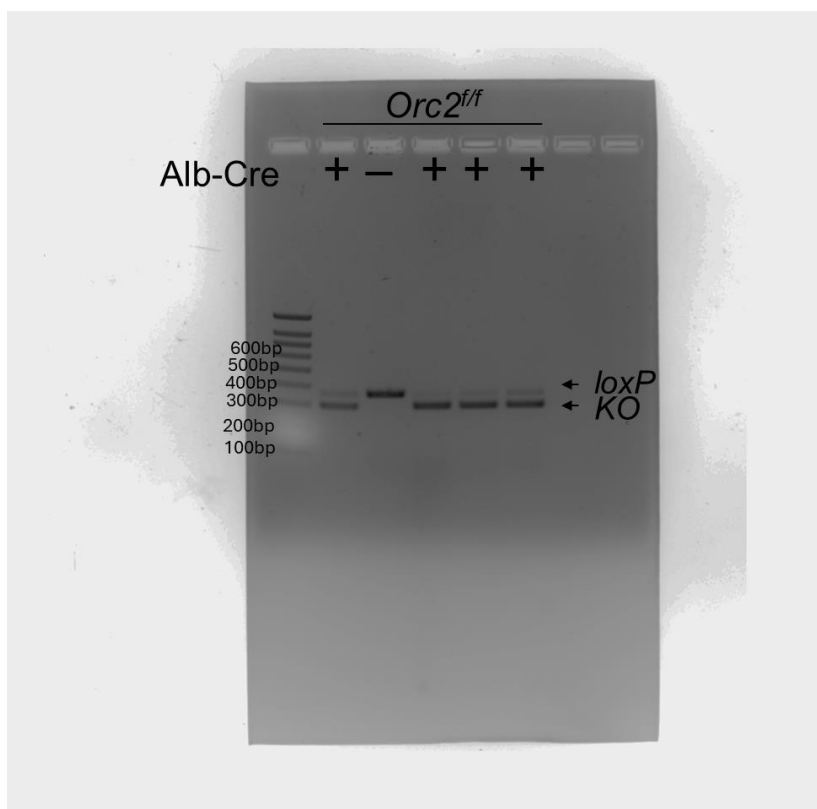

**Figure 4, Source Data 1. Original DNA gel picture corresponding to Figure 4, panel B to genotype the hepatocytes. Molecular weight markers are labelled for the appropriate panel. The top band represents *Orc2* loxP allele (without Albumin Cre expression), the bottom band represents *Orc2* KO allele (with Albumin Cre expression).**
