# Supplementary material for: DNA replication in primary hepatocytes without the six-subunit ORC
Source: eLife journal article supplement (doi:10.7554/elife.102915), 2024-12-31
Supplement: fig6-data3 [file elife-102915-fig6-data3-v1.zip]

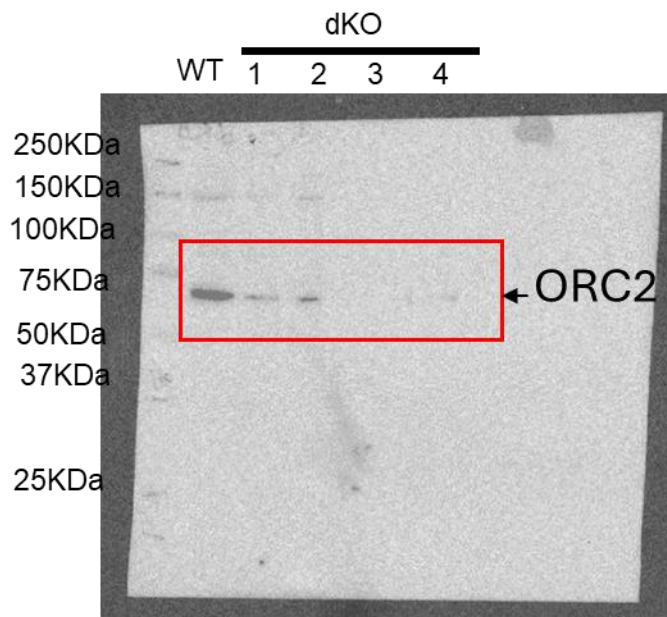

**Figure 6, Source Data 2.** Immunoblot of hepatocytes from *Orc1<sup>f/f</sup> Orc2<sup>f/f</sup>* mice (labelled with “WT”) and four of *Orc1<sup>f/f</sup> Orc2<sup>f/f</sup> Alb-cre<sup>+/-</sup>* mice (labelled with (dKO #1-#4)). Protein molecular weight ladder was labelled in the left. The band next to the arrow indicates the ORC2 protein expression level.
