# Supplementary material for: DNA replication in primary hepatocytes without the six-subunit ORC
Source: eLife journal article supplement (doi:10.7554/elife.102915), 2024-12-31
Supplement: fig6-data5 [file elife-102915-fig6-data5-v1.zip]

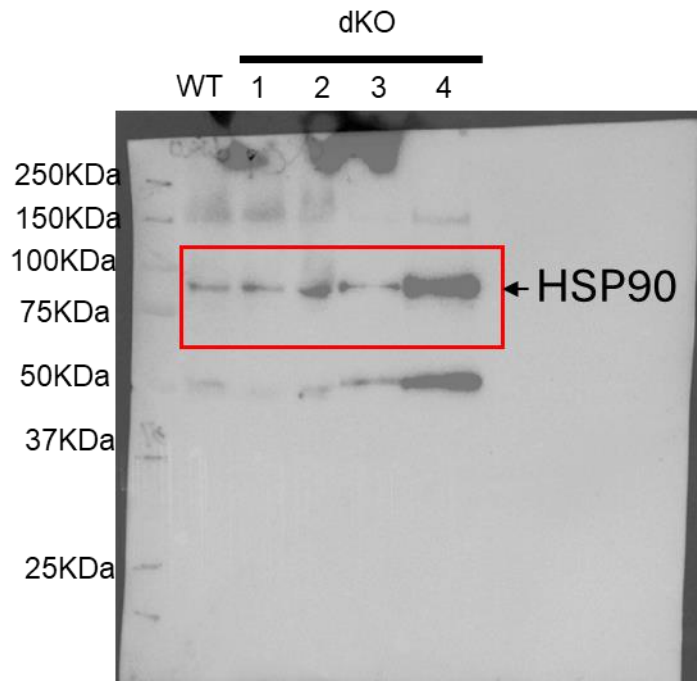

**Figure 6, Source Data 3.** Immunoblot of hepatocytes from *Orc1<sup>fl/fl</sup> Orc2<sup>fl/fl</sup>* mice (labelled with “WT”) and four of *Orc1<sup>fl/fl</sup> Orc2<sup>fl/fl</sup> Alb-cre<sup>+/-</sup>* mice (labelled with (dKO #1-#4)). Protein molecular weight ladder was labelled in the left. The band next to the arrow indicates the HSP90 protein expression level.
