# Supplementary material for: DNA replication in primary hepatocytes without the six-subunit ORC
Source: eLife. 2025 Apr 30;13:RP102915. doi: 10.7554/eLife.102915 (PMC12043314; doi:10.7554/eLife.102915)
Supplement: Source data 1. [file elife-102915-data1.xlsx]

## Sheet: Fig. 1C
		Genotype	Observed_number_of_animals	Expected_number_of_animals	Ratio_O/E
		Orc2 +/+	11	10.5	1.04762
		Orc2 FL/+	21	21	1
		Orc2 FL/FL	10	10.5	0.952381

## Sheet: Fig.1G
	Fig. 1G
	Relative absorbance, after normalization to day1
		Day, Average				Day, SD
		1	2	3	4	1	2	3	4
	ORC2+/+	1	2.01515	4.18687	9.24242	0.020202	0.0808081	0.136364	1.0202
	ORC2+/+ cre	1	1.3985	2.50376	5.95489	0.075188	0.0827068	0.180451	0.451128
	ORC2 fl/fl	1	2.21302	5.73373	13.8698	0.035503	0.0887574	0.301775	0.0946746
	ORC2 fl/fl cre	1	1.63303	2.44495	3.73394	0.0412844	0.0229358	0.119266	0.0733945

## Sheet: Fig. 2B
Alb-Cre
	Genotype	Observed	Expected	Ratio
	WT	27	25	1.08
	HET	60	50	1.2
	MUT	13	25	0.52

## Sheet: Fig.2D
									Fig.2D
									Quantification		WT	ORC2_KO#1	ORC2_KO#2	ORC2_KO#3
										ORC1	1.00003	0.86743	0.814586	0.826893
										ORC3	1	0.727244	0.824835	0.483418
										ORC5	0.999998	1.07975	0.780524	1.1612
										ORC6	0.999999	1.68602	1.22753	1.4511
										CDC6	1	1.16105	0.724393	0.799751
										MCM2	1	0.332738	0.441083	0.441703
										MCM3	1	0.300375	0.506111	0.603952

## Sheet: Fig. 2E-G
								Sex	Orc2	Body [g]	Liver [g]	liver/body
								Female	KO	15.59	0.9532	0.0611418
								Female	KO	16.9	0.9249	0.0547278
								Female	KO	14.98	0.9774	0.065247
								Female	KO	9.19	0.439	0.0477693
								Female	WT	19.17	1.4021	0.0731403
								Female	WT	18.17	1.1496	0.0632691
								Female	WT	18.68	1.2703	0.0680032
								Female	WT	18.23	1.5545	0.0852715
								Male	KO	22.8	1.423	0.0624123
								Male	KO	23.45	1.6289	0.0694627
								Male	KO	22.66	1.734	0.0765225
								Male	KO	19.6	0.89	0.0454082
								Male	KO	19.63	0.6312	0.0321549
								Male	KO	19.28	1.494	0.0774896
								Male	KO	23.85	1.8351	0.0769434
								Male	WT	28.66	1.9549	0.06821
								Male	WT	22.4	1.3388	0.0597679
								Male	WT	24.18	1.9969	0.0825848
								Male	WT	22.78	1.7366	0.0762335
								Male	WT	24.85	1.5468	0.0622455
								Male	WT	25.22	2.1755	0.0862609

## Sheet: Fig. 2I-K
	ORC2-WT	Area	Males (N=3)					ORC2-WT	Area	Females (N=3)
		<40	9	18	12				<40	41	31	81
		<60	60	76	78				<60	86	93	64
		<80	51	43	47				<80	20	20	5
		<100	21	11	11				<100	3	6	0
		>100	9	2	2				>100	0	0	0
	ORC2-KO	Area	Males (N=4)					ORC2-KO	Area	Females (N=3)
		<40	2	3	0	7			<40	1	4	1
		<60	23	27	2	30			<60	21	40	9
		<80	35	36	15	43			<80	29	34	8
		<100	65	55	24	34			<100	32	23	6
		>100	25	29	109	36			>100	67	49	126

## Sheet: Fig. 3B-D
	WT	Male	Male	Male	Male	Female	Female	Female	Female
	2n	40.7004	40.9254	39.029	41.3616	54.3986	60.7177	58.64	62.3572
	4n	43.9981	49.2166	45.2022	44.7942	38.0765	31.9023	32.8303	28.9588
	8n	10.5967	8.04637	13.3704	9.09649	4.8215	3.79441	4.38376	7.44841
	16n	2.12247	0.608828	1.67141	3.18268	0.655696	1.83399	2.43314	0.763402
	KO	Male	Male	Male	Male	Female	Female
	2n	40.3546	57.5198	38.0024	48.9518	67.7999	77.4182
	4n	28.8997	22.5884	38.0885288247035	37.8577	20.3057	12.3405
	8n	15.9844	9.36039	20.371	8.55904	8.38608	5.26409
	16n	8.66391	5.44557	5.4127	4.43764	3.99975	4.55216

## Sheet: Fig3E-G
			ORC2-WT	Male	Male	Male	Male	Female	Female
			2n	54.4348	71.1468	46.5936	87.022	73.7925	82.9813
			4n	33.9432	21.2014	46.2451	12.6412	18.6886	12.0217
			8n	13.5137	3.63636	7.22762	0.0990688	6.90594	3.82127
			16n	0.868352	2.65018	0.0165961	0.0198138	0.455942	0.600659
			ORC2-KO	Male	Male	Male	Male	Female	Female
			2n	37.5053	26.2674	24.7774	33.2044	29.3853	39.4369
			4n	23.3914	20.6274	27.1003	41.7896	17.6492	13.4082
			8n	17.2176	19.7402	16.2602	15.7678	15.4745	7.30459
			16n	23.7194	24.8099	22.6868	9.14148	34.9569	36.4442

## Sheet: Fig. 4D
	Fig. 4D	Edu positive cells %
		Alb-Cre-/- (WT)	cre +/- (KO)
	replicate 1	4.86486	2.30608
	replicate 2	2.95567	0.917431
	replicate 3	8.18859	0.651466
	replicate 4		2.01342

## Sheet: Fig. 5A-C
	Fig. 5A	Body weight
		Alb-Cre-/- (WT)	Alb-Cre+/- (KO)
		40.9	23.92
		23.2	19.95
		33.18	23
			28.99
			36.4
			31.5
			33.56
	Fig. 5B	Liver weight
		Alb-Cre-/- (WT)	Alb-Cre+/- (KO)
		0.84	0.77
		0.61	0.56
		0.66	0.5
			0.58
			0.58
			0.48
			0.56
	Fig. 5C	Ratio of Body/Liver
		Alb-Cre-/- (WT)	Alb-Cre+/- (KO)
		2.05379	3.21906
		2.62931	2.80702
		1.98915	2.17391
			2.00069
			1.59341
			1.52381
			1.66865

[truncated: 10 more sheets: Fig. 5F, Fig. 5H&I, Fig. 6C, Fig.6E, Fig. 6F_H_I, Fig.7A-C, Fig. 7E&F, Fig. 7H, Fig2 supplement, Fig7 supplement 1]
